# Supplementary material
Source: publisher figshare collection journal article supplement (https://aacr.figshare.com/articles/dataset/_/22651599)
Supplement: Supplementary file 1 [file 40209252]

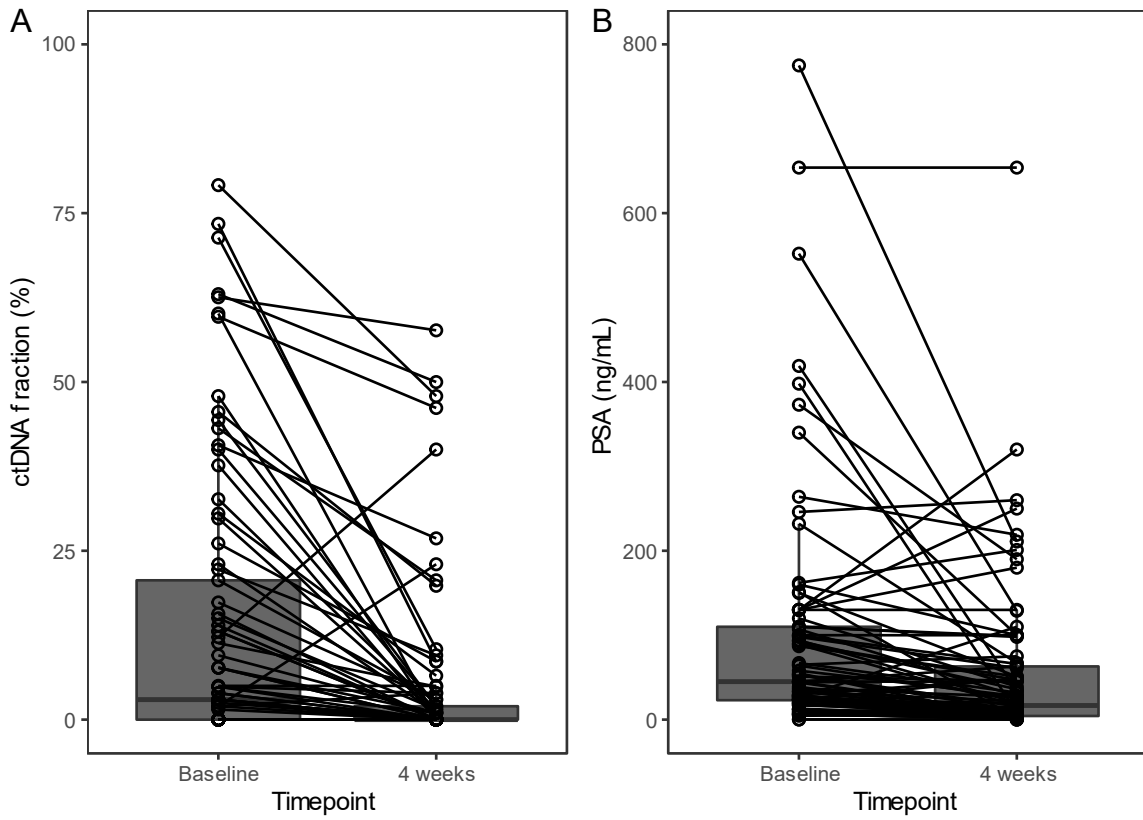

**Supplementary Figure S1:** Per patient (A) ctDNA fractions and (B) PSA levels at baseline and after 4 weeks of treatment.
